# Supplementary material for: Genomic Analysis of Chilean Strains ofCampylobacter jejunifrom Human Faeces
Source: Hindawi journal article supplement (doi:10.1155/2019/1902732), 2019-07-08
Supplement: f1 [file 1902732.f1.pdf]

**Table S1. Distribution of putative virulence genes among Chilean isolates as detected by PCR**

|         |                  | <i>cdtA</i> | <i>cdtB</i> | <i>cdtC</i> | <i>cadF</i> | <i>pldA</i> | <i>iam</i> |
|---------|------------------|-------------|-------------|-------------|-------------|-------------|------------|
| PUCV-1  | <i>C. jejuni</i> | +           | +           | +           | +           | +           | -          |
| PUCV-2  | <i>C. jejuni</i> | +           | +           | +           | +           | +           | -          |
| PUCV-3  | <i>C. jejuni</i> | +           | +           | +           | +           | +           | -          |
| PUCV-4  | <i>C. jejuni</i> | +           | +           | +           | +           | +           | -          |
| PUCV-5  | <i>C. jejuni</i> | +           | +           | +           | +           | +           | -          |
| PUCV-6  | <i>C. jejuni</i> | +           | +           | +           | +           | +           | -          |
| PUCV-7  | <i>C. coli</i>   | -           | -           | -           | +           | -           | +          |
| PUCV-8  | <i>C. coli</i>   | -           | -           | -           | +           | -           | +          |
| PUCV-9  | <i>C. jejuni</i> | +           | +           | +           | +           | -           | -          |
| PUCV-10 | <i>C. jejuni</i> | +           | +           | +           | +           | +           | -          |
| PUCV-11 | <i>C. jejuni</i> | +           | +           | +           | +           | +           | -          |
| PUCV-12 | <i>C. jejuni</i> | +           | +           | +           | +           | -           | -          |
| PUCV-13 | <i>C. jejuni</i> | +           | +           | +           | +           | +           | -          |
| PUCV-14 | <i>C. jejuni</i> | +           | +           | +           | +           | -           | -          |
| PUCV-15 | <i>C. jejuni</i> | +           | +           | +           | +           | +           | -          |
| PUCV-16 | <i>C. jejuni</i> | +           | +           | +           | +           | +           | -          |
| PUCV-17 | <i>C. jejuni</i> | +           | +           | +           | +           | +           | -          |
| PUCV-18 | <i>C. jejuni</i> | +           | +           | +           | +           | +           | -          |
| PUCV-19 | <i>C. jejuni</i> | +           | +           | +           | +           | +           | -          |
| PUCV-20 | <i>C. jejuni</i> | +           | +           | +           | +           | +           | -          |
| PUCV-21 | <i>C. jejuni</i> | +           | +           | +           | +           | +           | -          |
| PUCV-23 | <i>C. jejuni</i> | +           | +           | +           | +           | +           | -          |
| PUCV-24 | <i>C. jejuni</i> | +           | +           | +           | +           | +           | -          |
| PUCV-25 | <i>C. jejuni</i> | +           | +           | +           | +           | +           | -          |
| PUCV-26 | <i>C. jejuni</i> | +           | +           | +           | +           | +           | -          |
| PUCV-27 | <i>C. jejuni</i> | +           | +           | +           | +           | +           | -          |
| PUCV-28 | <i>C. jejuni</i> | +           | +           | +           | +           | +           | -          |

**Table S2. Distribution of susceptibility results among Chilean isolates by Double Dilution in Agar (CIM) and Kirby Bauer (B) methods and Fecal Leukocytes Test (FLT) when determined (ND=Not determined). Isolates have been grouped by flaA-RFLP groups. Amox-CA, Amoxicilin Clavulanic Acid.**

|                | Species          | Erythromycin |    | Ciprofloxacin |    | Tetracyclin |    | Gentamicin |    | Amox-CA | Ampicilin | FLT      |
|----------------|------------------|--------------|----|---------------|----|-------------|----|------------|----|---------|-----------|----------|
|                |                  | CIM          | KB | CIM           | KB | CIM         | KB | CIM        | KB | KB      | KB        |          |
| <b>PUCV-1</b>  | <i>C. Jejuni</i> | 2,00         | S  | 64,00         | R  | 16,00       | R  | 0.125      | S  | S       | R         | Positive |
| <b>PUCV-6</b>  | <i>C. Jejuni</i> | 2,00         | S  | 32,00         | R  | 0,50        | S  | 0,13       | S  | S       | R         | ND       |
| <b>PUCV-14</b> | <i>C. Jejuni</i> | 2,00         | S  | 32,00         | R  | 0,25        | S  | 0,13       | S  | S       | R         | ND       |
| <b>PUCV-19</b> | <i>C. Jejuni</i> | 2,00         | S  | 32,00         | R  | 1,00        | S  | 2,00       | S  | R       | R         | Positive |
| <b>PUCV-23</b> | <i>C. Jejuni</i> | 1,00         | S  | 32,00         | R  | 2,00        | S  | 1,00       | S  | R       | R         | ND       |
| <b>PUCV-24</b> | <i>C. Jejuni</i> | 2,00         | S  | 32,00         | R  | 4,00        | R  | 2,00       | S  | R       | R         | Positive |
| <b>PUCV-25</b> | <i>C. Jejuni</i> | 2,00         | S  | 32,00         | R  | 2,00        | S  | 0,13       | S  | I       | R         | ND       |
| <b>PUCV-26</b> | <i>C. Jejuni</i> | 2,00         | S  | 32,00         | R  | 4,00        | R  | 0,13       | S  | I       | R         | ND       |
| <b>PUCV-27</b> | <i>C. Jejuni</i> | 2,00         | S  | 64,00         | R  | 1,00        | S  | 0,25       | S  | I       | R         | ND       |
| <b>PUCV-2</b>  | <i>C. Jejuni</i> | 1,00         | S  | 0,06          | S  | 4,00        | R  | 1,00       | S  | S       | S         | Positive |
| <b>PUCV-11</b> | <i>C. Jejuni</i> | 1,00         | S  | 0,06          | S  | 0,25        | S  | 0,13       | S  | S       | S         | Negative |
| <b>PUCV-15</b> | <i>C. Jejuni</i> | 2,00         | S  | 0,06          | S  | 0,13        | S  | 0,13       | S  | S       | S         | ND       |
| <b>PUCV-16</b> | <i>C. Jejuni</i> | 2,00         | S  | 0,06          | S  | 0,25        | S  | 0,13       | S  | S       | S         | ND       |
| <b>PUCV-17</b> | <i>C. Jejuni</i> | 2,00         | S  | 0,06          | R  | 1,00        | S  | 1,00       | S  | S       | R         | ND       |
| <b>PUCV-3</b>  | <i>C. Jejuni</i> | 1,00         | S  | 0,13          | S  | 0,50        | S  | 0,13       | S  | S       | S         | Positive |
| <b>PUCV-10</b> | <i>C. Jejuni</i> | 2,00         | S  | 64,00         | R  | 0,25        | S  | 0,50       | S  | S       | R         | ND       |
| <b>PUCV-21</b> | <i>C. Jejuni</i> | 2,00         | S  | 0,13          | S  | 0,50        | S  | 1,00       | S  | R       | R         | ND       |
| <b>PUCV-28</b> | <i>C. Jejuni</i> | 1,00         | S  | 0,06          | S  | 1,00        | S  | 0,25       | S  | S       | I         | Positive |
| <b>PUCV-4</b>  | <i>C. Jejuni</i> | 2,00         | S  | 64,00         | R  | 8,00        | R  | 0,13       | S  | S       | R         | Negative |
| <b>PUCV-5</b>  | <i>C. Jejuni</i> | 2,00         | S  | 64,00         | R  | 16,00       | R  | 0,13       | S  | S       | R         | Positive |
| <b>PUCV-7</b>  | <i>C. Coli</i>   | 8,00         | S  | 32,00         | R  | 0,50        | S  | 0,13       | S  | S       | R         | ND       |
| <b>PUCV-8</b>  | <i>C. Coli</i>   | 16,00        | R  | 32,00         | R  | 0,50        | S  | 0,13       | S  | S       | R         | Positive |
| <b>PUCV-9</b>  | <i>C. Jejuni</i> | 0,50         | S  | 0,06          | S  | 0,50        | S  | 0,13       | S  | S       | S         | Negative |
| <b>PUCV-12</b> | <i>C. Jejuni</i> | 2,00         | S  | 32,00         | R  | 16,00       | R  | 0,13       | S  | S       | R         | Negative |
| <b>PUCV-13</b> | <i>C. Jejuni</i> | 1,00         | S  | 0,13          | S  | 0,25        | S  | 0,13       | S  | S       | R         | ND       |
| <b>PUCV-18</b> | <i>C. Jejuni</i> | 2,00         | S  | 64,00         | R  | 1,00        | S  | 2,00       | S  | S       | R         | Negative |
| <b>PUCV-20</b> | <i>C. Jejuni</i> | 1,00         | S  | 64,00         | R  | 0,25        | S  | 0,50       | S  | S       | R         | Positive |

Table S3. Multilocus Sequence Typing genotype (MLST), Clonal Complex (CC) and origin of the isolates that clustered with Chilean strains in the PHYLOVIZ 2.0 software on the basis of their wgMLST. NI, Not indicated; Origins different than clinical are in bold.

| Strain             | Country        | MLST       | CC         | Origin          | Host species                     |
|--------------------|----------------|------------|------------|-----------------|----------------------------------|
| PUCV-1             | Chile          | 50         | 21         | Clinical        | <i>Homo sapiens</i> , this study |
| SRR3215187         | USA            | 50         | 21         | Clinical        | <i>Homo sapiens</i>              |
| SRR1993533         | USA            | 50         | 21         | Clinical        | <i>Homo sapiens</i>              |
| SRR1999657         | USA            | 50         | 21         | Clinical        | <i>Homo sapiens</i>              |
| SRR3215189         | USA            | 50         | 21         | Clinical        | <i>Homo sapiens</i>              |
| ERR189826          | UK             | 536        | 21         | Clinical        | <i>Homo sapiens</i>              |
| SRR2727700         | <b>USA</b>     | <b>50</b>  | <b>21</b>  | <b>Ruminant</b> | <b><i>Bos taurus</i></b>         |
| ERR736711          | NI             | 50         | 21         | NI              | NI                               |
| ERR348972          | UK             | 50         | 21         | Clinical        | <i>Homo sapiens</i>              |
| PUCV-3             | Chile          | 475        | 48         | Clinical        | <i>Homo sapiens</i> , this study |
| SRR1816214         | NI             | 475        | 48         | NI              | NI                               |
| SRR1975114         | USA            | 475        | 48         | Clinical        | <i>Homo sapiens</i>              |
| SRR1772864         | USA            | 475        | 48         | Clinical        | <i>Homo sapiens</i>              |
| ERR189832          | NI             | 475        | 48         | NI              | NI                               |
| SRR1816209         | NI             | 475        | 48         | NI              | NI                               |
| IN_CJ_FI_273.fasta | <b>Finland</b> | <b>475</b> | <b>48</b>  | <b>Poultry</b>  | <b><i>Gallus gallus</i></b>      |
| ERR757413          | NI             | 918        | 48         | NI              | NI                               |
| PUCV-2             | Chile          | 353        | 353        | Clinical        | <i>Homo sapiens</i> , this study |
| ERR330473          | UK             | 353        | 353        | Clinical        | <i>Homo sapiens</i>              |
| SRR2157043         | USA            | 353        | 353        | Clinical        | <i>Homo sapiens</i>              |
| ERR494578          | UK             | 353        | 353        | Clinical        | <i>Homo sapiens</i>              |
| SRR2938812         | USA            | 353        | 353        | Clinical        | <i>Homo sapiens</i>              |
| SRR3380856         | USA            | NI         | NI         | NI              | NI                               |
| ERR108370          | UK             | 353        | 353        | Clinical        | <i>Homo sapiens</i>              |
| SRR3380866         | USA            | 1953       | 353        | Clinical        | <i>Homo sapiens</i>              |
| SRR1811817         | <b>USA</b>     | <b>353</b> | <b>353</b> | <b>Poultry</b>  | <b><i>Gallus gallus</i></b>      |

**Table S4. Comparison between Chilean strains and the reference genome of *C. jejuni* (strain NCTC 11168, GenBank AL111168.1), using the metabolic reconstruction comparison tool of SEED viewer version 2.0 at the RAST server.**

| Category                                         | Subcategory                                                         | Subsystem                                   | Role                                                                                                  |
|--------------------------------------------------|---------------------------------------------------------------------|---------------------------------------------|-------------------------------------------------------------------------------------------------------|
| <b>Table S4-A</b>                                | <b>PUCV-1 vs reference genome of <i>C. Jejuni</i> (NCTC 111168)</b> |                                             |                                                                                                       |
| Cell Wall and Capsule                            | Capsular and extracellular polysacchrides                           | Capsular heptose biosynthesis               | Capsular polysaccharide biosynthesis heptosyltransferase HddD                                         |
| Cell Wall and Capsule                            | Capsular and extracellular polysacchrides                           | Capsular heptose biosynthesis               | GDP-mannose 4,6-dehydratase (EC 4.2.1.47)                                                             |
| Cofactors, Vitamins, Prosthetic Groups, Pigments | Biotin                                                              | Biotin biosynthesis                         | Long-chain-fatty-acid--CoA ligase (EC 6.2.1.3)                                                        |
| DNA Metabolism                                   | DNA replication                                                     | DNA topoisomerases, Type I, ATP-independent | DNA topoisomerase III, TraE-type (EC 5.99.1.2)                                                        |
| Membrane Transport                               | Protein and nucleoprotein secretion system, Type IV                 | Conjugative transfer                        | IncQ plasmid conjugative transfer DNA nicking endonuclease TraR (pTi VirD2 homolog)                   |
| Membrane Transport                               | Protein and nucleoprotein secretion system, Type IV                 | Conjugative transfer                        | IncQ plasmid conjugative transfer protein TraG                                                        |
| Membrane Transport                               | Protein and nucleoprotein secretion system, Type IV                 | Conjugative transfer                        | IncQ plasmid conjugative transfer protein TraQ (RP4 TrbM homolog)                                     |
| Membrane Transport                               | Protein and nucleoprotein secretion system, Type IV                 | Vir-like type 4 secretion system            | ATPase required for both assembly of type IV secretion complex and secretion of T-DNA complex, VirB11 |
| Membrane Transport                               | Protein and nucleoprotein secretion system, Type IV                 | Vir-like type 4 secretion system            | ATPase required for both assembly of type IV secretion complex and secretion of T-DNA complex, VirB4  |
| Membrane Transport                               | Protein and nucleoprotein secretion system, Type IV                 | Vir-like type 4 secretion system            | Coupling protein VirD4, ATPase required for T-DNA transfer                                            |
| Membrane Transport                               | Protein and nucleoprotein secretion system, Type IV                 | Vir-like type 4 secretion system            | Inner membrane protein forms channel for type IV secretion of T-DNA complex, VirB3                    |

|                             |                                                     |                                      |                                                                                                               |
|-----------------------------|-----------------------------------------------------|--------------------------------------|---------------------------------------------------------------------------------------------------------------|
| Membrane Transport          | Protein and nucleoprotein secretion system, Type IV | Vir-like type 4 secretion system     | Inner membrane protein forms channel for type IV secretion of T-DNA complex, VirB8                            |
| Membrane Transport          | Protein and nucleoprotein secretion system, Type IV | Vir-like type 4 secretion system     | Inner membrane protein of type IV secretion of T-DNA complex, TonB-like, VirB10                               |
| Membrane Transport          | Protein and nucleoprotein secretion system, Type IV | Vir-like type 4 secretion system     | Inner membrane protein of type IV secretion of T-DNA complex, VirB6                                           |
| Membrane Transport          | Protein and nucleoprotein secretion system, Type IV | Vir-like type 4 secretion system     | Lipoprotein of type IV secretion complex that spans outer membrane and periplasm, VirB7                       |
| Membrane Transport          | Protein and nucleoprotein secretion system, Type IV | Vir-like type 4 secretion system     | Major pilus subunit of type IV secretion complex, VirB2                                                       |
| Membrane Transport          | Protein and nucleoprotein secretion system, Type IV | Vir-like type 4 secretion system     | Minor pilin of type IV secretion complex, VirB5                                                               |
| Membrane Transport          | Protein and nucleoprotein secretion system, Type IV | Vir-like type 4 secretion system     | Outer membrane and periplasm component of type IV secretion of T-DNA complex, has secretin-like domain, VirB9 |
| Membrane Transport          | Protein and nucleoprotein secretion system, Type IV | pVir Plasmid of <i>Campylobacter</i> | Hypothetical protein pVir0015                                                                                 |
| Nucleosides and Nucleotides | Pyrimidines                                         | pyrimidine conversions               | Uridine phosphorylase (EC 2.4.2.3)                                                                            |

**Table S4-B**

**PUCV-2 vs reference genome of *C. Jejuni* (NCTC 111168)**

|                    |                                   |                           |                                                    |
|--------------------|-----------------------------------|---------------------------|----------------------------------------------------|
| Membrane Transport | Protein secretion system, Type VI | Type VI secretion systems | Outer membrane protein ImpK/VasF, OmpA/MotB domain |
| Membrane Transport | Protein secretion system, Type VI | Type VI secretion systems | Uncharacterized protein ImpJ/VasE                  |
| Membrane Transport | Protein secretion system, Type VI | Type VI secretion systems | Uncharacterized protein ImpA                       |
| Membrane Transport | Protein secretion system, Type VI | Type VI secretion systems | Uncharacterized protein ImpB                       |
| Membrane Transport | Protein secretion system, Type VI | Type VI secretion systems | Uncharacterized protein ImpC                       |
| Membrane Transport | Protein secretion system, Type VI | Type VI secretion systems | Uncharacterized protein similar to VCA0109         |

|                                                    |                                           |                               |                                                               |
|----------------------------------------------------|-------------------------------------------|-------------------------------|---------------------------------------------------------------|
| Membrane Transport                                 | Protein secretion system, Type VI         | Type VI secretion systems     | Protein ImpG/VasA                                             |
| Membrane Transport                                 | Protein secretion system, Type VI         | Type VI secretion systems     | Uncharacterized protein ImpH/VasB                             |
| Membrane Transport                                 | Protein secretion system, Type VI         | Type VI secretion systems     | VgrG protein                                                  |
| Carbohydrates                                      | Organic acids                             | Glycerate metabolism          | Glycerate kinase (EC 2.7.1.31)                                |
| Cell Wall and Capsule                              | Capsular and extracellular polysacchrides | Capsular heptose biosynthesis | GDP-mannose 4,6-dehydratase (EC 4.2.1.47)                     |
| Cell Wall and Capsule                              | Capsular and extracellular polysacchrides | Capsular heptose biosynthesis | Capsular polysaccharide biosynthesis heptosyltransferase HddD |
| Phages, Prophages, Transposable elements, Plasmids | Phages, Prophages                         | Phage tail proteins           | Phage tail length tape-measure protein                        |
| Phages, Prophages, Transposable elements, Plasmids | Phages, Prophages                         | Phage packaging machinery     | Phage terminase, small subunit                                |
| Phages, Prophages, Transposable elements, Plasmids | Phages, Prophages                         | Phage packaging machinery     | Phage terminase, large subunit                                |
| Phages, Prophages, Transposable elements, Plasmids | Phages, Prophages                         | Phage packaging machinery     | Phage portal protein                                          |
| Clustering-based subsystems                        | no subcategory                            | CBSS-257314.1.peg.752         | Adenine-specific methyltransferase (EC 2.1.1.72)              |
| Cell Wall and Capsule                              | Capsular and extracellular polysacchrides | Rhamnose containing glycans   | dTDP-glucose 4,6-dehydratase (EC 4.2.1.46)                    |
| Cell Wall and Capsule                              | Capsular and extracellular polysacchrides | Rhamnose containing glycans   | Glucose-1-phosphate thymidyltransferase (EC 2.7.7.24)         |
| Nucleosides and Nucleotides                        |                                           | pyrimidine conversions        |                                                               |
|                                                    | Pyrimidines                               |                               | Uridine phosphorylase (EC 2.4.2.3)                            |

---

**Table S4-C****PUCV-3 vs reference genome of *C. Jejuni* (NCTC 111168)**

|                       |                                                     |                                                                              |                                                                                                                               |
|-----------------------|-----------------------------------------------------|------------------------------------------------------------------------------|-------------------------------------------------------------------------------------------------------------------------------|
| Cell Wall and Capsule | Capsular and extracellular polysacchrides           | Capsular heptose biosynthesis                                                | Capsular polysaccharide biosynthesis heptosyltransferase HddD                                                                 |
| Cell Wall and Capsule | Capsular and extracellular polysacchrides           | Capsular heptose biosynthesis<br>DNA topoisomerases, Type I, ATP-independent | GDP-mannose 4,6-dehydratase (EC 4.2.1.47)                                                                                     |
| DNA Metabolism        | DNA replication                                     | Restriction-Modification System                                              | DNA topoisomerase III, TraE-type (EC 5.99.1.2)<br>Type III restriction-modification system DNA endonuclease res (EC 3.1.21.5) |
| DNA Metabolism        | no subcategory                                      | Restriction-Modification System                                              | Type III restriction-modification system methylation subunit (EC 2.1.1.72)                                                    |
| DNA Metabolism        | no subcategory                                      | Conjugative transfer                                                         | IncQ plasmid conjugative transfer DNA nicking endonuclease TraR (pTi VirD2 homolog)                                           |
| Membrane Transport    | Protein and nucleoprotein secretion system, Type IV | Conjugative transfer                                                         | IncQ plasmid conjugative transfer protein TraG<br>IncQ plasmid conjugative transfer protein TraQ (RP4 TrbM homolog)           |
| Membrane Transport    | Protein and nucleoprotein secretion system, Type IV | Conjugative transfer                                                         | ATPase required for both assembly of type IV secretion complex and secretion of T-DNA complex, VirB11                         |
| Membrane Transport    | Protein and nucleoprotein secretion system, Type IV | Vir-like type 4 secretion system                                             | ATPase required for both assembly of type IV secretion complex and secretion of T-DNA complex, VirB4                          |
| Membrane Transport    | Protein and nucleoprotein secretion system, Type IV | Vir-like type 4 secretion system                                             | Coupling protein VirD4, ATPase required for T-DNA transfer                                                                    |
| Membrane Transport    | Protein and nucleoprotein secretion system, Type IV | Vir-like type 4 secretion system                                             | Inner membrane protein forms channel for type IV secretion of T-DNA complex, VirB3                                            |
| Membrane Transport    | Protein and nucleoprotein secretion system, Type IV | Vir-like type 4 secretion system                                             | Inner membrane protein forms channel for type IV secretion of T-DNA complex, VirB8                                            |
| Membrane Transport    | Protein and nucleoprotein secretion system, Type IV | Vir-like type 4 secretion system                                             | Inner membrane protein of type IV secretion of T-DNA complex, TonB-like, VirB10                                               |

|                                                          |                                                     |                                  |                                                                                                               |
|----------------------------------------------------------|-----------------------------------------------------|----------------------------------|---------------------------------------------------------------------------------------------------------------|
| Membrane Transport                                       | Protein and nucleoprotein secretion system, Type IV | Vir-like type 4 secretion system | Inner membrane protein of type IV secretion of T-DNA complex, VirB6                                           |
| Membrane Transport                                       | Protein and nucleoprotein secretion system, Type IV | Vir-like type 4 secretion system | Lipoprotein of type IV secretion complex that spans outer membrane and periplasm, VirB7                       |
| Membrane Transport                                       | Protein and nucleoprotein secretion system, Type IV | Vir-like type 4 secretion system | Major pilus subunit of type IV secretion complex, VirB2                                                       |
| Membrane Transport                                       | Protein and nucleoprotein secretion system, Type IV | Vir-like type 4 secretion system | Minor pilin of type IV secretion complex, VirB5                                                               |
| Membrane Transport                                       | Protein and nucleoprotein secretion system, Type IV | Vir-like type 4 secretion system | Outer membrane and periplasm component of type IV secretion of T-DNA complex, has secretin-like domain, VirB9 |
| Phages, Prophages,<br>Transposable elements,<br>Plasmids | Phages, Prophages                                   | Phage tail proteins              | Phage tail length tape-measure protein                                                                        |



**Table S5. Summary of prophage sequences found within genomes of *C. Jejuni* strains studied using the PHAST software**

| Strain | Region length Kb, completeness | First common Phage % of hit | % GC | Hits against Virus, prophage, or bacterial database or GenBank file                                                                                                                                                                                                                                                                                                                                                                                                                                                                                                                                                                                                                                                                                                                                                                                                                                                                | Most common phage name (hit_genes_count)                                                                                                                                                                                                                                                                                                                                                                                                                    |
|--------|--------------------------------|-----------------------------|------|------------------------------------------------------------------------------------------------------------------------------------------------------------------------------------------------------------------------------------------------------------------------------------------------------------------------------------------------------------------------------------------------------------------------------------------------------------------------------------------------------------------------------------------------------------------------------------------------------------------------------------------------------------------------------------------------------------------------------------------------------------------------------------------------------------------------------------------------------------------------------------------------------------------------------------|-------------------------------------------------------------------------------------------------------------------------------------------------------------------------------------------------------------------------------------------------------------------------------------------------------------------------------------------------------------------------------------------------------------------------------------------------------------|
| PUCV 1 | 8.0, incomplete                | 62.5                        | 25.0 | <p>PHAGE_Campyl_CP220_NC_027997: hypothetical phage protein (Radical SAM family); PP_00001; phage(gi937457334)</p> <p>PHAGE_Synech_S_SKS1_NC_020851: hypothetical protein; PP_00002; phage(gi472340890)</p> <p>PHAGE_Synech_S_SM2_NC_015279: capsular polysaccharide biosynthesis protein; PP_00003; phage(gi326781954)</p> <p>PHAGE_Synech_S_SKS1_NC_020851: hypothetical protein; PP_00004; phage(gi472340890)</p> <p>putative sugar transferase [Campylobacter jejuni subsp. doylei 269.97]. gi153951711 reflYP_001398763.1; PP_00005</p> <p>PHAGE_Escher_WG01_NC_031928: hypothetical protein; PP_00006; phage(gi100045)</p> <p>PHAGE_Shigel_SHSML_52_1_NC_031090: hypothetical protein; PP_00007; phage(gi100008)</p> <p>PHAGE_Synech_S_SKS1_NC_020851: 3,4-dihydroxy-2-butanone 4-phosphate synthase; PP_00008; phage(gi472340887)</p>                                                                                       | <p>PHAGE_Synech_S_SKS1_NC_020851(5)</p> <p>PHAGE_Synech_S_SM2_NC_015279(2)</p> <p>PHAGE_Shigel_SHSML_52_1_NC_031090(2)</p> <p>PHAGE_Acinet_Acj61_NC_014661(1)</p> <p>PHAGE_Acinet_Acj61_NC_014660(1)</p> <p>PHAGE_Yersin_vB_YenM_TG1_NC_028820(1)</p> <p>PHAGE_Yersin_phiR1_RT_NC_019909(1)</p> <p>PHAGE_Enterо_IME08_NC_014260(1)</p> <p>PHAGE_Campyl_CP220_NC_027997(1)</p> <p>PHAGE_Ralsto_RSL1_NC_010811(1)</p> <p>PHAGE_Synech_S_CAM9_NC_031922(1)</p> |
|        | 7.3, incomplete                | 37.5                        | 27.7 | <p>PHAGE_Pseudo_NP1_NC_031058: hypothetical protein; PP_00065; phage(gi100036)</p> <p>cell division trigger factor [Campylobacter jejuni subsp. jejuni S3]. gi1384442543 reflYP_005658795.1; PP_00066</p> <p>PHAGE_Bacill_G_NC_023719: gp257; PP_00067; phage(gi593777713)</p> <p>PHAGE_Caulob_CcrColossus_NC_019406: putative peptide formylmethionine deformylase; PP_00068; phage(gi414088160)</p> <p>PROPHAGE_Escher_Sakai: putative ATP-dependent protease; PP_00069; phage(gi15833954)</p> <p>hypothetical protein A911_00915 [Campylobacter jejuni subsp. jejuni PT14]. gi1407941653 reflYP_006857293.1; PP_00070</p> <p>putative kinase [Campylobacter jejuni subsp. jejuni PT14]. gi1407941652 reflYP_006857292.1; PP_00071</p> <p>PHAGE_Prochl_P_SSM7_NC_015290: PRGA-formyltransferase; PP_00072; phage(gi326784531)</p> <p>PHAGE_Bacill_CP_51_NC_025423: putative resistance protein; PP_00073; phage(gi725949539)</p> | <p>PHAGE_Synech_S_SKS1_NC_020851(5)</p> <p>PHAGE_Synech_S_SM2_NC_015279(2)</p> <p>PHAGE_Shigel_SHSML_52_1_NC_031090(2)</p> <p>PHAGE_Acinet_Acj61_NC_014661(1)</p> <p>PHAGE_Acinet_Acj61_NC_014660(1)</p> <p>PHAGE_Yersin_vB_YenM_TG1_NC_028820(1)</p> <p>PHAGE_Yersin_phiR1_RT_NC_019909(1)</p> <p>PHAGE_Enterо_IME08_NC_014260(1)</p> <p>PHAGE_Campyl_CP220_NC_027997(1)</p> <p>PHAGE_Ralsto_RSL1_NC_010811(1)</p> <p>PHAGE_Synech_S_CAM9_NC_031922(1)</p> |

|           |                     |       |      |                                                                                                                                                                                                                                                                                                                                                                                                                                                                                                                                                                                                                                                                                                                                                                                                                                                                                                                                                                                                                                                                                                                                                                                                                                                                                                                                                                                                                                        |                                                                                                                                                                                                                                                                                                                                                                                                                                                                                                                                                                                                                                                                                                                                                                                                                                                                        |
|-----------|---------------------|-------|------|----------------------------------------------------------------------------------------------------------------------------------------------------------------------------------------------------------------------------------------------------------------------------------------------------------------------------------------------------------------------------------------------------------------------------------------------------------------------------------------------------------------------------------------------------------------------------------------------------------------------------------------------------------------------------------------------------------------------------------------------------------------------------------------------------------------------------------------------------------------------------------------------------------------------------------------------------------------------------------------------------------------------------------------------------------------------------------------------------------------------------------------------------------------------------------------------------------------------------------------------------------------------------------------------------------------------------------------------------------------------------------------------------------------------------------------|------------------------------------------------------------------------------------------------------------------------------------------------------------------------------------------------------------------------------------------------------------------------------------------------------------------------------------------------------------------------------------------------------------------------------------------------------------------------------------------------------------------------------------------------------------------------------------------------------------------------------------------------------------------------------------------------------------------------------------------------------------------------------------------------------------------------------------------------------------------------|
| PUCV<br>2 | 8.1,<br>incomplete  | 11.11 | 29.8 | <p>PHAGE_Synech_S_SSM7_NC_015287: putative nucleotide-sugar epimerase; PP_00207; phage(gi326783792)</p> <p>PHAGE_Prochl_P_TIM68_NC_028955: putative nucleotidyltransferase; PP_00208; phage(gi971760366)</p> <p>PHAGE_Caulob_Cr30_NC_025422: phosphoheptose isomerase; PP_00209; phage(gi725949171)</p> <p>ADP-heptose--LPS heptosyltransferase II [Campylobacter jejuni subsp. jejuni PT14]. gil407942530reflYYP_006858173.1l; PP_00210</p> <p>PHAGE_Staphy_phiN315_NC_004740: probable ss-1,3-N-acetylglucosaminyltransferase; PP_00211; phage(gi30043988)</p> <p>Tgh003 [Campylobacter jejuni subsp. jejuni M1]. gil384441768reflYYP_005658071.1l; PP_00212</p> <p>PHAGE_Synech_ACG_2014f_NC_026927: hypothetical protein; PP_00213; phage(gi100232)</p> <p>PHAGE_Synech_S_CAM9_NC_031922: terminase large subunit; PP_00214; phage(gi100031)</p>                                                                                                                                                                                                                                                                                                                                                                                                                                                                                                                                                                                   | <p>PHAGE_Cronob_vB_CsaM_GAP32_NC_019401(1)</p> <p>PHAGE_Prochl_P_SSM7_NC_015290(1)</p> <p>PHAGE_Synech_S_SSM7_NC_015287(1)</p> <p>PHAGE_Enterov_vB_KleM_RaK2_NC_019526(1)</p> <p>PHAGE_Pseudo_phiPsa374_NC_023601(1)</p> <p>PHAGE_Bacill_Shanette_NC_028983(1)</p> <p>PHAGE_Synech_S_SKS1_NC_020851(1)</p> <p>PHAGE_Synech_ACG_2014f_NC_026927(1)</p> <p>PHAGE_Caulob_Cr30_NC_025422(1)</p> <p>PHAGE_Prochl_P_SSM2_NC_006883(1)</p> <p>PHAGE_Vibrio_VpKK5_NC_026610(1)</p> <p>PHAGE_Strept_Dp_1_NC_015274(1)</p> <p>PHAGE_Rhizob_RHEph06_NC_027296(1)</p> <p>PHAGE_Bacill_JL_NC_028982(1)</p> <p>PHAGE_Escher_4_NC_027364(1)</p> <p>PHAGE_Bacill_G_NC_023719(1)</p> <p>PHAGE_Caulob_CrColossus_NC_019406(1)</p> <p>PHAGE_Pseudo_VCM_NC_029065(1)</p> <p>PHAGE_Pseudo_NP1_NC_031058(1)</p> <p>PHAGE_Bacill_CP_51_NC_025423(1)</p> <p>PHAGE_Escher_121Q_NC_025447(1)</p> |
|           | 10.7,<br>incomplete | 21.42 | 27.2 | <p>PHAGE_Synech_S_CAM7_NC_031927: phosphate-induced stress protein; PP_00217; phage(gi100227)</p> <p>PHAGE_Staphy_phiN315_NC_004740: probable ss-1,3-N-acetylglucosaminyltransferase; PP_00218; phage(gi30043988)</p> <p>hypothetical; PP_00219</p> <p>putative butyryltransferase [Campylobacter jejuni 4031]. gil549693118reflYYP_008624076.1l; PP_00220</p> <p>PHAGE_Aeromo_PX29_NC_023688: hypothetical protein; PP_00221; phage(gi593773872)</p> <p>FIG01210424: hypothetical protein [Campylobacter jejuni 4031]. gil549693116reflYYP_008624074.1l; PP_00222</p> <p>unknown [Campylobacter jejuni 4031]. gil549693115reflYYP_008624073.1l; PP_00223</p> <p>PHAGE_Escher_phAPEC8_NC_020079: putative dTDP-glucose 4,6-dehydratase; PP_00224; phage(gi448260373)</p> <p>PHAGE_Enterov_phi92_NC_023693: Phi92_gp066; PP_00225; phage(gi726646999)</p> <p>PHAGE_Bacill_SPbeta_NC_001884: hypothetical protein; PP_00226; phage(gi9630147)</p> <p>lipid A biosynthesis lauroyl acyltransferase [Campylobacter jejuni subsp. jejuni PT14]. gil407942519reflYYP_006858161.1l; PP_00227</p> <p>lipopolysaccharide heptosyltransferase I [Campylobacter jejuni subsp. jejuni PT14]. gil407942518reflYYP_006858160.1l; PP_00228</p> <p>PHAGE_Brucel_Pr_NC_019447: putative DNA-PolB associated Exonuclease; PP_00229; phage(gi418487886)</p> <p>PHAGE_Prochl_P_SSM2_NC_006883: nucleotide sugar epimerase; PP_00230; phage(gi61806141)</p> | <p>PHAGE_Synech_ACG_2014f_NC_026927(3)</p> <p>PHAGE_Sphing_PAU_NC_019521(2)</p> <p>PHAGE_Synech_ACG_2014f_NC_026927(2)</p> <p>PHAGE_Enterov_phi92_NC_023693(2)</p> <p>PHAGE_Escher_phAPEC8_NC_020079(2)</p> <p>PHAGE_Brucel_Tb_NC_019446(1)</p> <p>PHAGE_Bacill_SP_15_NC_031245(1)</p> <p>PHAGE_Staphy_phiN315_NC_004740(1)</p> <p>PHAGE_Cellul_phi4-1_NC_021788(1)</p> <p>PHAGE_Synech_S_SKS1_NC_020851(1)</p> <p>PHAGE_Caulob_Cr30_NC_025422(1)</p> <p>PHAGE_Prochl_P_SSM2_NC_006883(1)</p> <p>PHAGE_Aeromo_PX29_NC_023688(1)</p> <p>PHAGE_Bacill_SPbeta_NC_001884(1)</p> <p>PHAGE_Synech_S_SM2_NC_015279(1)</p> <p>PHAGE_Bacill_G_NC_023719(1)</p> <p>PHAGE_Cellul_phi17-2_NC_021798(1)</p> <p>PHAGE_Brucel_Pr_NC_019447(1)</p>                                                                                                                                     |

|                   |                           |              |             |                                                                                                                                                                                                                                                                                                                                                                                                                                                                                                                                                                                                                                                                                                                                                                                                                                                                                                                                                                                                                                                                                                                                                                                                                                                                                                                                                                                                                                                                                                                                                                                                                                                                                                                                                                                                                                                                                                                                                                                                                                                                                                                                                                                                                                                                                                                                                                                                                                                                                                                                                                                                                                                                                                                                                                                                                                                                                                                                                                                                                                                                                                                                                                                                                                                                                                                                                                                                                                                     |                                                                                                                                                                                                                                                                                                                                                                                                                                                                                                                                                                                                                                                                                                                                                                                                                                                                                                                                                                                                                                                                                                                                                                                                                                                                                                                                                                                                                                                                                                                                                                                                                                                                                                                                                                                                                                                                                                                                                                                                                                                                                                                                                                                                                  |
|-------------------|---------------------------|--------------|-------------|-----------------------------------------------------------------------------------------------------------------------------------------------------------------------------------------------------------------------------------------------------------------------------------------------------------------------------------------------------------------------------------------------------------------------------------------------------------------------------------------------------------------------------------------------------------------------------------------------------------------------------------------------------------------------------------------------------------------------------------------------------------------------------------------------------------------------------------------------------------------------------------------------------------------------------------------------------------------------------------------------------------------------------------------------------------------------------------------------------------------------------------------------------------------------------------------------------------------------------------------------------------------------------------------------------------------------------------------------------------------------------------------------------------------------------------------------------------------------------------------------------------------------------------------------------------------------------------------------------------------------------------------------------------------------------------------------------------------------------------------------------------------------------------------------------------------------------------------------------------------------------------------------------------------------------------------------------------------------------------------------------------------------------------------------------------------------------------------------------------------------------------------------------------------------------------------------------------------------------------------------------------------------------------------------------------------------------------------------------------------------------------------------------------------------------------------------------------------------------------------------------------------------------------------------------------------------------------------------------------------------------------------------------------------------------------------------------------------------------------------------------------------------------------------------------------------------------------------------------------------------------------------------------------------------------------------------------------------------------------------------------------------------------------------------------------------------------------------------------------------------------------------------------------------------------------------------------------------------------------------------------------------------------------------------------------------------------------------------------------------------------------------------------------------------------------------------------|------------------------------------------------------------------------------------------------------------------------------------------------------------------------------------------------------------------------------------------------------------------------------------------------------------------------------------------------------------------------------------------------------------------------------------------------------------------------------------------------------------------------------------------------------------------------------------------------------------------------------------------------------------------------------------------------------------------------------------------------------------------------------------------------------------------------------------------------------------------------------------------------------------------------------------------------------------------------------------------------------------------------------------------------------------------------------------------------------------------------------------------------------------------------------------------------------------------------------------------------------------------------------------------------------------------------------------------------------------------------------------------------------------------------------------------------------------------------------------------------------------------------------------------------------------------------------------------------------------------------------------------------------------------------------------------------------------------------------------------------------------------------------------------------------------------------------------------------------------------------------------------------------------------------------------------------------------------------------------------------------------------------------------------------------------------------------------------------------------------------------------------------------------------------------------------------------------------|
| <p>PUCV<br/>3</p> | <p>19.3,<br/>complete</p> | <p>19.35</p> | <p>31.2</p> | <p>PHAGE_Staphy_phiPV83_NC_002486: repressor; PP_00179; phage(gi9635682)<br/> hypothetical protein N755_00182 [Campylobacter jejuni subsp. jejuni 00-2544]. gi543949153reflYYP_008541497.1l; PP_00180<br/> PHAGE_Lister_List_36_NC_024364: hypothetical protein; PP_00181; phage(gi658307695)<br/> hypothetical protein N755_00180 [Campylobacter jejuni subsp. jejuni 00-2544]. gi543949151reflYYP_008541495.1l; PP_00182<br/> PHAGE_Clostr_phiSM101_NC_008265: putative modification methylase dpmia; PP_00183; phage(gi110804053)<br/> <br/> phage virion morphogenesis protein [Campylobacter jejuni subsp. jejuni 00-2544]. gi543949149reflYYP_008541493.1l; PP_00184<br/> <br/> PHAGE_Pseudo_PPpW_3_NC_023006: putative tail protein; PP_00185; phage(gi564292502)<br/> <br/> hypothetical protein N135_00335 [Campylobacter jejuni subsp. jejuni 00-2425]. gi544061971reflYYP_008561676.1l; PP_00186<br/> <br/> hypothetical protein N755_00175 [Campylobacter jejuni subsp. jejuni 00-2544]. gi543949146reflYYP_008541490.1l; PP_00187<br/> <br/> PHAGE_Escher_vB_EcoM_ep3_NC_025430: tail protein; PP_00188; phage(gi712913215)<br/> <br/> PROPHAGE_Xylell_Temecula1: contractile tail sheath protein; PP_00189; phage(gi28198986)<br/> <br/> PHAGE_Campyl_CP21_NC_019507: putative tail fiber protein; PP_00190; phage(gi422935209)<br/> <br/> PHAGE_Vibrio_qdvp001_NC_029057: tail protein; PP_00191; phage(gi985757190)<br/> <br/> PHAGE_Campyl_CP220_NC_027997: hypothetical protein; PP_00192; phage(gi937457381)<br/> <br/> PHAGE_Pseudo_PPpW_3_NC_023006: putative tail-collar fibre protein; PP_00193; phage(gi564292496)<br/> <br/> PHAGE_Pseudo_PPpW_3_NC_023006: putative tail protein I; PP_00194; phage(gi564292495)<br/> <br/> PHAGE_Pseudo_PPpW_3_NC_023006: putative baseplate J-like protein; PP_00195; phage(gi564292494)<br/> <br/> PHAGE_Pseudo_PPpW_3_NC_023006: putative baseplate assembly protein with lysozyme; PP_00196; phage(gi564292493)<br/> <br/> hypothetical protein CJE0235 [Campylobacter jejuni RM1221]. gi57237246reflYYP_178258.1l; PP_00197<br/> <br/> PHAGE_Pseudo_PPpW_3_NC_023006: putative baseplate assembly protein V; PP_00198; phage(gi564292492)<br/> <br/> hypothetical protein CJE0237 [Campylobacter jejuni RM1221]. gi57237248reflYYP_178260.1l; PP_00199<br/> <br/> hypothetical protein CJS3_0704 [Campylobacter jejuni subsp. jejuni S3]. gi1384443029reflYYP_005659281.1l; PP_00200<br/> <br/> lipoprotein [Campylobacter jejuni subsp. jejuni S3]. gi1384443030reflYYP_005659282.1l; PP_00201<br/> <br/> hypothetical protein N755_00162 [Campylobacter jejuni subsp. jejuni 00-2544]. gi543949133reflYYP_008541477.1l; PP_00202<br/> <br/> PHAGE_Enterо_UAB_Phi78_NC_020414: peptidase; PP_00203; phage(gi456351073)<br/> <br/> hypothetical protein CJE0243 [Campylobacter jejuni RM1221]. gi57237253reflYYP_178266.1l; PP_00204<br/> <br/> PHAGE_Mannhe_vB_MhM_3927AP2_NC_028766: hypothetical protein; PP_00205; phage(gi971741532)<br/> <br/> hypothetical protein N755_00158 [Campylobacter jejuni subsp. jejuni 00-2544]. gi543949129reflYYP_008541473.1l; PP_00206<br/> <br/> PHAGE_Vibrio_VHML_NC_004456: ORF26; PP_00207; phage(gi27311193)<br/> <br/> hypothetical protein N755_00156 [Campylobacter jejuni subsp. jejuni 00-2544]. gi543949127reflYYP_008541471.1l; PP_00208<br/> PHAGE_Burkho_KS10_NC_011216: hypothetical protein; PP_00209; phage(gi198449267)</p> | <p>PHAGE_Pseudo_PPpW_3_NC_023006(6)<br/> PHAGE_Escher_vB_EcoM_ep3_NC_025430(4)<br/> PHAGE_Escher_vB_EcoM_ECO1230_10_NC_027995(4)<br/> PHAGE_Vibrio_VP58_5_NC_027981(4)<br/> PHAGE_Campyl_CPX_NC_016562(3)<br/> PHAGE_Pseudo_JBD25_NC_027992(3)<br/> PHAGE_Vibrio_vB_VpaM_MAR_NC_019722(3)<br/> PHAGE_Campyl_NCTC12673_NC_015464(2)<br/> PHAGE_Campyl_CP21_NC_019507(2)<br/> PHAGE_Haemop_SuMu_NC_019455(2)<br/> PHAGE_Vibrio_VHML_NC_004456(2)<br/> PHAGE_Vibrio_X29_NC_024369(2)<br/> PHAGE_Enterо_UAB_Phi78_NC_020414(1)<br/> PHAGE_Staphy_StauST398_2_NC_021323(1)<br/> PHAGE_Lister_LP_083_2_NC_024383(1)<br/> PHAGE_Mannhe_vB_MhM_3927AP2_NC_028766(1)<br/> PHAGE_Ralsto_RSFl_NC_028899(1)<br/> PHAGE_Clostr_phiSM101_NC_008265(1)<br/> PHAGE_Halomo_phiHAP_1_NC_010342(1)<br/> PHAGE_Staphy_phiPV83_NC_002486(1)<br/> PHAGE_Staphy_phiETA_NC_003288(1)<br/> PHAGE_Staphy_JS01_NC_021773(1)<br/> PHAGE_Shewan_144_NC_025463(1)<br/> PHAGE_Burkho_KS10_NC_011216(1)<br/> PHAGE_Vibrio_VP882_NC_009016(1)<br/> PHAGE_Pseudo_MP29_NC_011613(1)<br/> PHAGE_Proteu_93_NC_027390(1)<br/> PHAGE_Lister_List_36_NC_024364(1)<br/> PHAGE_Proteu_vB_PmiP_Pm5460_NC_028916(1)<br/> PHAGE_Ralsto_RS138_NC_029107(1)<br/> PHAGE_Clostr_phiCDHM11_NC_029001(1)<br/> PHAGE_Salmon_SEN4_NC_029015(1)<br/> PHAGE_Campyl_CP220_NC_027997(1)<br/> PHAGE_Clostr_phiCD481_1_NC_028951(1)<br/> PHAGE_Lister_vB_LmoM_AG20_NC_020871(1)<br/> PHAGE_Campyl_PC14_NC_031909(1)<br/> PHAGE_Mannhe_vB_MhM_587AP1_NC_028898(1)<br/> PHAGE_Geobac_E3_NC_029073(1)<br/> PHAGE_Rhizob_RR1_A_NC_021560(1)<br/> PHAGE_Pectob_PPL_NC_019542(1)<br/> PHAGE_Clostr_phiCDHM13_NC_029116(1)<br/> PHAGE_Enterо_K1_5_NC_008152(1)<br/> PHAGE_Salmon_SEN5_NC_028701(1)<br/> PHAGE_Lister_LP_048_NC_024359(1)<br/> PHAGE_Mannhe_phiMHaA1_NC_008201(1)<br/> PHAGE_Lister_LP_125_NC_021781(1)<br/> PHAGE_Ralsto_RSL2_NC_028950(1)<br/> PHAGE_Clostr_phiCDHM19_NC_028996(1)<br/> PHAGE_Vibrio_qdvp001_NC_029057(1)<br/> PHAGE_Bacter_Lily_NC_028841(1)<br/> PHAGE_Enterо_P88_NC_026014(1)<br/> PHAGE_Staphy_StauST398_1_NC_021326(1)<br/> PHAGE_Burkho_phiE125_NC_003309(1)<br/> PHAGE_Campyl_CP30A_NC_018861(1)<br/> PHAGE_Escher_pro483_NC_028943(1)</p> |
|-------------------|---------------------------|--------------|-------------|-----------------------------------------------------------------------------------------------------------------------------------------------------------------------------------------------------------------------------------------------------------------------------------------------------------------------------------------------------------------------------------------------------------------------------------------------------------------------------------------------------------------------------------------------------------------------------------------------------------------------------------------------------------------------------------------------------------------------------------------------------------------------------------------------------------------------------------------------------------------------------------------------------------------------------------------------------------------------------------------------------------------------------------------------------------------------------------------------------------------------------------------------------------------------------------------------------------------------------------------------------------------------------------------------------------------------------------------------------------------------------------------------------------------------------------------------------------------------------------------------------------------------------------------------------------------------------------------------------------------------------------------------------------------------------------------------------------------------------------------------------------------------------------------------------------------------------------------------------------------------------------------------------------------------------------------------------------------------------------------------------------------------------------------------------------------------------------------------------------------------------------------------------------------------------------------------------------------------------------------------------------------------------------------------------------------------------------------------------------------------------------------------------------------------------------------------------------------------------------------------------------------------------------------------------------------------------------------------------------------------------------------------------------------------------------------------------------------------------------------------------------------------------------------------------------------------------------------------------------------------------------------------------------------------------------------------------------------------------------------------------------------------------------------------------------------------------------------------------------------------------------------------------------------------------------------------------------------------------------------------------------------------------------------------------------------------------------------------------------------------------------------------------------------------------------------------------|------------------------------------------------------------------------------------------------------------------------------------------------------------------------------------------------------------------------------------------------------------------------------------------------------------------------------------------------------------------------------------------------------------------------------------------------------------------------------------------------------------------------------------------------------------------------------------------------------------------------------------------------------------------------------------------------------------------------------------------------------------------------------------------------------------------------------------------------------------------------------------------------------------------------------------------------------------------------------------------------------------------------------------------------------------------------------------------------------------------------------------------------------------------------------------------------------------------------------------------------------------------------------------------------------------------------------------------------------------------------------------------------------------------------------------------------------------------------------------------------------------------------------------------------------------------------------------------------------------------------------------------------------------------------------------------------------------------------------------------------------------------------------------------------------------------------------------------------------------------------------------------------------------------------------------------------------------------------------------------------------------------------------------------------------------------------------------------------------------------------------------------------------------------------------------------------------------------|

|                           |             |             |                                                                                                                                                                                                                                                                                                                                                                                                                                                                                                                                                                                                                                                                                                                                                                                                                                                                                                                                                                                                                                                                                                                                                                                                                                                                                                                                                                                                                                                                                                                                                                                                                                                                                                                                                                                                       |                                                                                                                                                                                                                                                                                                                                                                                                                                                                                                                                                                                                                                                                                                                                                                                                                                                                                                                                                                                                         |
|---------------------------|-------------|-------------|-------------------------------------------------------------------------------------------------------------------------------------------------------------------------------------------------------------------------------------------------------------------------------------------------------------------------------------------------------------------------------------------------------------------------------------------------------------------------------------------------------------------------------------------------------------------------------------------------------------------------------------------------------------------------------------------------------------------------------------------------------------------------------------------------------------------------------------------------------------------------------------------------------------------------------------------------------------------------------------------------------------------------------------------------------------------------------------------------------------------------------------------------------------------------------------------------------------------------------------------------------------------------------------------------------------------------------------------------------------------------------------------------------------------------------------------------------------------------------------------------------------------------------------------------------------------------------------------------------------------------------------------------------------------------------------------------------------------------------------------------------------------------------------------------------|---------------------------------------------------------------------------------------------------------------------------------------------------------------------------------------------------------------------------------------------------------------------------------------------------------------------------------------------------------------------------------------------------------------------------------------------------------------------------------------------------------------------------------------------------------------------------------------------------------------------------------------------------------------------------------------------------------------------------------------------------------------------------------------------------------------------------------------------------------------------------------------------------------------------------------------------------------------------------------------------------------|
| <p>26,<br/>incomplete</p> | <p>15.0</p> | <p>31.0</p> | <p>attL TTTTGTTTTTTA<br/> PHAGE_Burkho_BcepMu_NC_005882: gp29; PP_00211; phage(gi48696939)<br/> PHAGE_Burkho_BcepMu_NC_005882: gp30; PP_00212; phage(gi48696940)<br/> PHAGE_Ralsto_RSY1_NC_025115: hypothetical protein; PP_00213; phage(gi691326883)<br/> hypothetical; PP_00214<br/> PHAGE_Salmon_Fels_2_NC_010463: tail protein; PP_00215; phage(gi169936019)<br/> DNA-binding protein [Campylobacter jejuni RM1221]. gi57237265 reflYP_178278.1 ; PP_00216<br/> hypothetical; PP_00217<br/> hypothetical protein CJE0257 [Campylobacter jejuni RM1221]. gi57237267 reflYP_178280.1 ; PP_00218<br/> PHAGE_Burkho_BcepMu_NC_005882: gp02; PP_00219; phage(gi48696912)<br/> hypothetical protein CJE0259 [Campylobacter jejuni RM1221]. gi57237269 reflYP_178282.1 ; PP_00220<br/> hypothetical protein CJE0260 [Campylobacter jejuni RM1221]. gi57237270 reflYP_178283.1 ; PP_00221<br/> hypothetical protein CJE0261 [Campylobacter jejuni RM1221]. gi57237271 reflYP_178284.1 ; PP_00222<br/> hypothetical; PP_00223<br/> hypothetical protein CJS3_0693 [Campylobacter jejuni subsp. jejuni S3]. gi1384443018 reflYP_005659270.1 ; PP_00224<br/> PHAGE_Bacill_BalMu_1_NC_030945: hypothetical protein; PP_00225; phage(gi100015)<br/> hypothetical protein CJS3_0690 [Campylobacter jejuni subsp. jejuni S3]. gi1384443015 reflYP_005659267.1 ; PP_00226<br/> hypothetical protein CJS3_0688 [Campylobacter jejuni subsp. jejuni S3]. gi1384443013 reflYP_005659265.1 ; PP_00227<br/> hypothetical protein CJS3_0687 [Campylobacter jejuni subsp. jejuni S3]. gi1384443012 reflYP_005659264.1 ; PP_00228<br/> PHAGE_Haemop_SuMu_NC_019455: phage transposase; PP_00229; phage(gi418489040)<br/> attR TTTTGTTTTTTA<br/> PHAGE_Ralsto_RS138_NC_029107: integrase; PP_00230; phage(gi985760913)</p> | <p>PHAGE_Burkho_BcepMu_NC_005882(3)<br/> PHAGE_Rhizob_RR1_B_NC_021557(2)<br/> PHAGE_Rhodov_RS1_NC_020866(2)<br/> PHAGE_Burkho_phiE255_NC_009237(2)<br/> PHAGE_Bacill_BalMu_1_NC_030945(2)<br/> PHAGE_Vibrio_12B12_NC_021070(2)<br/> PHAGE_Escher_vB_EcoM_ep3_NC_025430(1)<br/> PHAGE_Ralsto_RSA1_NC_009382(1)<br/> PHAGE_Erwin_ENT90_NC_019932(1)<br/> PHAGE_Pseudo_vB_PaeS_PAO1_Ab30_NC_026601(1)<br/> PHAGE_Salmon_RE_2010_NC_019488(1)<br/> PHAGE_Rhodob_RCI_NC_020839(1)<br/> PHAGE_Mannhe_vB_MhM_3927AP2_NC_028766(1)<br/> PHAGE_Escher_vB_EcoM_ECO1230_10_NC_027995(1)<br/> PHAGE_Ralsto_RSY1_NC_025115(1)<br/> PHAGE_Enter_Mu_NC_000929(1)<br/> PHAGE_Yersin_L_413C_NC_004745(1)<br/> PHAGE_Pseudo_B3_NC_006548(1)<br/> PHAGE_Pseudo_vB_PaeS_PMI05_NC_028667(1)<br/> PHAGE_Salmon_Fels_2_NC_010463(1)<br/> PHAGE_Ralsto_RS138_NC_029107(1)<br/> PHAGE_Haemop_SuMu_NC_019455(1)<br/> PHAGE_Enter_SfMu_NC_027382(1)<br/> PHAGE_Pseudo_JBD24_NC_020203(1)<br/> PHAGE_Escher_pro483_NC_028943(1)</p> |
|---------------------------|-------------|-------------|-------------------------------------------------------------------------------------------------------------------------------------------------------------------------------------------------------------------------------------------------------------------------------------------------------------------------------------------------------------------------------------------------------------------------------------------------------------------------------------------------------------------------------------------------------------------------------------------------------------------------------------------------------------------------------------------------------------------------------------------------------------------------------------------------------------------------------------------------------------------------------------------------------------------------------------------------------------------------------------------------------------------------------------------------------------------------------------------------------------------------------------------------------------------------------------------------------------------------------------------------------------------------------------------------------------------------------------------------------------------------------------------------------------------------------------------------------------------------------------------------------------------------------------------------------------------------------------------------------------------------------------------------------------------------------------------------------------------------------------------------------------------------------------------------------|---------------------------------------------------------------------------------------------------------------------------------------------------------------------------------------------------------------------------------------------------------------------------------------------------------------------------------------------------------------------------------------------------------------------------------------------------------------------------------------------------------------------------------------------------------------------------------------------------------------------------------------------------------------------------------------------------------------------------------------------------------------------------------------------------------------------------------------------------------------------------------------------------------------------------------------------------------------------------------------------------------|

|                       |                            |             |             |                                                                                                                                                                                                                                                                                                                                                                                                                                                                                                                                                                                                                                                                                                                                                                                                                                                                                                                                     |                                                                                                                                                                                                                                                                                                                                                                                                            |
|-----------------------|----------------------------|-------------|-------------|-------------------------------------------------------------------------------------------------------------------------------------------------------------------------------------------------------------------------------------------------------------------------------------------------------------------------------------------------------------------------------------------------------------------------------------------------------------------------------------------------------------------------------------------------------------------------------------------------------------------------------------------------------------------------------------------------------------------------------------------------------------------------------------------------------------------------------------------------------------------------------------------------------------------------------------|------------------------------------------------------------------------------------------------------------------------------------------------------------------------------------------------------------------------------------------------------------------------------------------------------------------------------------------------------------------------------------------------------------|
| <b>NCTC<br/>11168</b> | <b>8.7,<br/>incomplete</b> | <b>25.0</b> | <b>27.5</b> | <p>PHAGE_Prochl_P_SSM2_NC_006883: nucleotide sugar epimerase; PP_01101; phage(gi61806141)</p> <p>PHAGE_Brucel_Pr_NC_019447: putative DNA-PolB associated Exonuclease; PP_01102; phage(gi418487886)</p> <p>heptosyltransferase I [Campylobacter jejuni subsp. jejuni NCTC 11168 = ATCC 700819]. gil218562747reflYYP_002344526.1l; PP_01103</p> <p>lipid A biosynthesis lauroyl acyltransferase [Campylobacter jejuni subsp. jejuni NCTC 11168 = ATCC 700819]. gil218562748reflYYP_002344527.1l; PP_01104</p> <p>PHAGE_Bacill_SPbeta_NC_001884: hypothetical protein; PP_01105; phage(gi9630147)</p> <p>PHAGE_Staphy_phiN315_NC_004740: probable ss-1,3-N-acetylglucosaminyltransferase; PP_01106; phage(gi30043988)</p> <p>PHAGE_Synech_ACG_2014f_NC_026927: hypothetical protein; PP_01107; phage(gi100232)</p> <p>PHAGE_Staphy_phiN315_NC_004740: probable ss-1,3-N-acetylglucosaminyltransferase; PP_01108; phage(gi30043988)</p> | <p>PHAGE_Synech_ACG_2014f_NC_026927(2)</p> <p>PHAGE_Staphy_phiN315_NC_004740(1)</p> <p>PHAGE_Brucel_Tb_NC_019446(1)</p> <p>PHAGE_Cellul_phi4:1_NC_021788(1)</p> <p>PHAGE_Bacill_SPbeta_NC_001884(1)</p> <p>PHAGE_Cellul_phi17:2_NC_021798(1)</p> <p>PHAGE_Synech_S_SKS1_NC_020851(1)</p> <p>PHAGE_Caulob_Cr30_NC_025422(1)</p> <p>PHAGE_Brucel_Pr_NC_019447(1)</p> <p>PHAGE_Prochl_P_SSM2_NC_006883(1)</p> |
|                       | <b>6.6</b>                 | <b>37.5</b> | <b>30.0</b> | <p>PHAGE_Bacill_SP_15_NC_031245: type II N-methyl DNA methyltransferase; PP_01389; phage(gi100148)</p> <p>PHAGE_Caulob_Cr30_NC_025422: phosphoheptose isomerase; PP_01390; phage(gi725949171)</p> <p>PHAGE_Caulob_Cr30_NC_025422: D,D-heptose 7-phosphate kinase; PP_01391; phage(gi725949173)</p> <p>methyltransferase family protein [Campylobacter jejuni subsp. jejuni NCTC 11168 = ATCC 700819]. gil218563030reflYYP_002344809.1l; PP_01392</p> <p>PHAGE_Synech_ACG_2014f_NC_026927: hypothetical protein; PP_01393; phage(gi100233)</p> <p>PHAGE_Synech_ACG_2014f_NC_026927: hypothetical protein; PP_01394; phage(gi100224)</p> <p>hypothetical protein Cj1429c [Campylobacter jejuni subsp. jejuni NCTC 11168 = ATCC 700819]. gil218563033reflYYP_002344812.1l; PP_01395</p> <p>PHAGE_Escher_phAPEC8_NC_020079: putative dTDP-4-dehydrorhamnose 3,5-epimerase; PP_01396; phage(gi448260371)</p>                             | <p>PHAGE_Synech_S_CAM7_NC_031927(3)</p> <p>PHAGE_Synech_S_SKS1_NC_020851(2)</p> <p>PHAGE_Enterо_phi92_NC_023693(2)</p> <p>PHAGE_Caulob_Cr30_NC_025422(2)</p> <p>PHAGE_Escher_phAPEC8_NC_020079(2)</p> <p>PHAGE_Sphing_PAU_NC_019521(2)</p> <p>PHAGE_Prochl_P_SSM2_NC_006883(2)</p> <p>PHAGE_Bacill_SP_15_NC_031245(1)</p> <p>PHAGE_Bacill_G_NC_023719(1)</p> <p>PHAGE_Synech_ACG_2014f_NC_026927(1)</p>    |
